# Supplementary material
Source: PubMed Central journal article supplement (PMC8941485)
Supplement: aim-olf-M220308-M22-0308_Supplement.pdf [file aim-olf-M220308-M22-0308_Supplement.pdf]

## Supplementary Material\*

Bouzid D, Visseaux B, Kassasseya C, et al. Comparison of patients infected with Delta versus Omicron COVID-19 variants presenting to Paris emergency departments. A retrospective cohort study *Ann Intern Med.* 2022. [Epub ahead of print]. doi:10.7326/M22-0308

| Item           | Page |
|----------------|------|
| Study Protocol | 2    |

\* This supplementary material was provided by the authors to give readers further details on their article. The material was reviewed but not copyedited.

« Caractéristiques et pronostic des patients consultant aux urgences pour un diagnostic de COVID au variant Omicron comparé au variant Delta »

DOMURG

## PROTOCOLE DE RECHERCHE N'IMPLIQUANT PAS LA PERSONNE HUMAINE

Version N°1-0 du **12/01/2022**  
Code projet AP-HP : **APHP220057**

Investigateur Coordonnateur : Dr Donia BOUZID  
Service d'Accueil des Urgences  
Hôpital Bichat  
donia.bouزيد@aphp.fr

Responsable scientifique : Pr Yonathan FREUND  
Service d'Accueil des Urgences  
Hôpital Pitié-Salpêtrière  
yonathan.freund@aphp.fr

Gestionnaire (Responsable du traitement) :  
AP-HP et par délégation :  
Délégation à la Recherche Clinique et à l'Innovation (DRCI)  
Hôpital Saint-Louis  
1 avenue Claude Vellefaux - 75475 Paris cedex 10

Structure chargée du suivi de la recherche :  
Unité de Recherche Clinique de l'Est Parisien (URC-Est)  
Hôpital Saint-Antoine  
184 avenue du faubourg Saint-Antoine - 75012 Paris  
Réfèrent projet : Sarah SALHI  
saranesine.salhi@aphp.fr

Délégation à la Recherche Clinique et à l'Innovation (DRCI)  
Hôpital Saint Louis 75010 PARIS

|                                                                                                                                         |
|-----------------------------------------------------------------------------------------------------------------------------------------|
| <p style="text-align: center;"><b>Page de signature</b><br/><b>d'un protocole de recherche n'impliquant pas la personne humaine</b></p> |
|-----------------------------------------------------------------------------------------------------------------------------------------|

Titre : Caractéristiques et pronostic des patients consultant aux urgences pour un diagnostic de COVID au variant Omicron comparé au variant Delta

Acronyme : DOMURG

Version N° 1-0 du 12/01/2022

Code projet : APHP220057

**Investigateur coordonnateur**

Dr Donia Bouzid  
Service d'Accueil des Urgences  
Hôpital Bichat  
Paris

Date : ...../...../.....  
Signature :

**Gestionnaire**

Assistance Publique – Hôpitaux de Paris  
Délégation à la Recherche Clinique et à  
l'Innovation  
Hôpital Saint Louis  
75010 PARIS

Date : ...../...../.....  
Signature :

La recherche sera conduite conformément au protocole et aux dispositions législatives et réglementaires en vigueur.

# TABLE DES MATIÈRES

|            |                                                                                          |           |
|------------|------------------------------------------------------------------------------------------|-----------|
| <b>1.</b>  | <b>RESUME.....</b>                                                                       | <b>5</b>  |
| <b>2.</b>  | <b>JUSTIFICATION SCIENTIFIQUE DE LA RECHERCHE .....</b>                                  | <b>7</b>  |
| 2.1.       | ETAT ACTUEL DES CONNAISSANCES RELATIVES AU DOMAINE CONCERNE .....                        | 7         |
| 2.2.       | DESCRIPTION DU OU DES ELEMENTS SUR LESQUELS PORTE LA RECHERCHE .....                     | 7         |
| 2.3.       | FAISABILITE ET COHERENCE DU GROUPE DE TRAVAIL.....                                       | 8         |
| 2.4.       | RESULTATS ATTENDUS ET PERSPECTIVES / HYPOTHESES/ JUSTIFICATION DE L'INTERET PUBLIC ..... | 8         |
| <b>3.</b>  | <b>OBJECTIFS.....</b>                                                                    | <b>8</b>  |
| 3.1.       | OBJECTIF PRINCIPAL .....                                                                 | 9         |
| 3.2.       | OBJECTIFS SECONDAIRES .....                                                              | 9         |
| <b>4.</b>  | <b>METHODE ET POPULATION .....</b>                                                       | <b>9</b>  |
| 4.1.       | TYPE D'ETUDE .....                                                                       | 9         |
| 4.2.       | PERIODE DE L'ETUDE .....                                                                 | 9         |
| 4.3.       | SOURCES DES DONNEES A CARACTERE PERSONNEL .....                                          | 9         |
| 4.4.       | POPULATION ETUDIEE.....                                                                  | 10        |
| 4.5.       | CRITERES DE JUGEMENT .....                                                               | 11        |
| 4.6.       | DEROULEMENT DE LA RECHERCHE .....                                                        | 11        |
| <b>5.</b>  | <b>ASPECTS STATISTIQUES.....</b>                                                         | <b>12</b> |
| 5.1.       | JUSTIFICATION STATISTIQUE DE LA TAILLE DE L'ECHANTILLON .....                            | 12        |
| 5.2.       | DESCRIPTION DES METHODES STATISTIQUES .....                                              | 12        |
| <b>6.</b>  | <b>GESTION DES DONNEES.....</b>                                                          | <b>13</b> |
| 6.1.       | MODALITES DE RECUEIL DES DONNEES.....                                                    | 13        |
| 6.2.       | CIRCUIT DES DONNEES ET METHODE DE PROTECTION DE LEUR CONFIDENTIALITE .....               | 13        |
| 6.3.       | CONSERVATION DES DOCUMENTS ET DES DONNEES.....                                           | 14        |
| <b>7.</b>  | <b>ASPECTS ETHIQUES ET LEGAUX.....</b>                                                   | <b>14</b> |
| 7.1.       | ROLE DU PROMOTEUR.....                                                                   | 14        |
| 7.2.       | MODALITES D'INFORMATION DE LA POPULATION CONCERNEE .....                                 | 14        |
| 7.3.       | DEMARCHES RELATIVES A LA REGLEMENTATION INFORMATIQUE ET LIBERTE.....                     | 14        |
| 7.4.       | DEMANDE D'AVIS AU COMITE D'ETHIQUE.....                                                  | 15        |
| 7.5.       | RESPONSABILITES DE L'INVESTIGATEUR VIS-A-VIS DU PROMOTEUR.....                           | 15        |
| 7.6.       | RAPPORT FINAL DE LA RECHERCHE.....                                                       | 15        |
| <b>8.</b>  | <b>REGLES RELATIVES A LA PUBLICATION .....</b>                                           | <b>15</b> |
| <b>9.</b>  | <b>BIBLIOGRAPHIE .....</b>                                                               | <b>16</b> |
| <b>10.</b> | <b>ADDENDA.....</b>                                                                      | <b>16</b> |
| 10.1.      | LISTE DES VARIABLES.....                                                                 | 16        |
| 10.2.      | SUPPORTS UTILISES POUR LE RECUEIL DES DONNEES A CARACTERE PERSONNEL .....                | 17        |
| 10.3.      | LISTE DES EQUIPES ASSOCIEES A LA RECHERCHE .....                                         | 17        |

# 1. RESUME

|                                                                         |                                                                   |                                                                                                                                                                                                                                                                                                                                                                                                                                                                                                                                                                                                                                                                                                                                                                                                                                                                                                                                                                                                                                                                                                                                                                                                                                                                                                                                                                                                                                                                                                                                          |
|-------------------------------------------------------------------------|-------------------------------------------------------------------|------------------------------------------------------------------------------------------------------------------------------------------------------------------------------------------------------------------------------------------------------------------------------------------------------------------------------------------------------------------------------------------------------------------------------------------------------------------------------------------------------------------------------------------------------------------------------------------------------------------------------------------------------------------------------------------------------------------------------------------------------------------------------------------------------------------------------------------------------------------------------------------------------------------------------------------------------------------------------------------------------------------------------------------------------------------------------------------------------------------------------------------------------------------------------------------------------------------------------------------------------------------------------------------------------------------------------------------------------------------------------------------------------------------------------------------------------------------------------------------------------------------------------------------|
| Titre                                                                   |                                                                   | « Caractéristiques et pronostic des patients consultant aux urgences pour un diagnostic de COVID au variant Omicron comparé au variant Delta.»                                                                                                                                                                                                                                                                                                                                                                                                                                                                                                                                                                                                                                                                                                                                                                                                                                                                                                                                                                                                                                                                                                                                                                                                                                                                                                                                                                                           |
| Titre court / acronyme                                                  |                                                                   | DOMURG                                                                                                                                                                                                                                                                                                                                                                                                                                                                                                                                                                                                                                                                                                                                                                                                                                                                                                                                                                                                                                                                                                                                                                                                                                                                                                                                                                                                                                                                                                                                   |
| Equipe(s) projet                                                        | Nombre d'équipes associées à l'étude, recherche ou évaluation :   | 13                                                                                                                                                                                                                                                                                                                                                                                                                                                                                                                                                                                                                                                                                                                                                                                                                                                                                                                                                                                                                                                                                                                                                                                                                                                                                                                                                                                                                                                                                                                                       |
|                                                                         | Nom, titre et fonction du responsable de l'équipe coordinatrice : | Dr Donia Bouzid<br>PHC                                                                                                                                                                                                                                                                                                                                                                                                                                                                                                                                                                                                                                                                                                                                                                                                                                                                                                                                                                                                                                                                                                                                                                                                                                                                                                                                                                                                                                                                                                                   |
| Contexte de l'étude, recherche ou évaluation                            |                                                                   | A ce jour, La pandémie de COVID-19 a été responsable de plus de 5 millions de décès à travers le monde et plus de 100 000 en France. En novembre 2021, un nouveau variant a été mis en évidence en Afrique du Sud, pendant la quatrième vague liée au variant Delta en France. Le premier cas positif lié au variant Omicron a été rapporté mi-décembre en Ile de France. Depuis, l'épidémie de SARS-CoV-2 voit une transition du variant Delta vers le variant Omicron sans la disparition complète du Delta. Les premières données publiées sur les caractéristiques cliniques de la COVID-19 liée au variant Omicron restent encore insuffisantes. Une équipe Sud-Africaine conduite sur 466 patients porteurs du variant Omicron a montré que ces derniers avaient des tableaux cliniques peu sévères. En effet, moins d'un tiers d'entre eux ont présenté des pneumonies et parmi ceux qui étaient hospitalisés pour pneumonie à COVID-19, 45% d'entre eux ont nécessité une oxygénothérapie. En comparant le pourcentage d'admission en réanimation des malades pris en charge pour une infection liée à Omicron à ceux infectés précédemment par un autre variant, on constate une diminution de 4.3% à 1% ( $p < 0.001$ ). Une récente étude a été réalisée au Danemark et confirme ces observations, tout en rapportant que 83% de leur population infectée par Omicron était vaccinée par deux doses au minimum ce qui pose l'hypothèse d'un variant avec beaucoup de mutations engendrant une réponse vaccinale insuffisante. |
| Objectifs principal et secondaires                                      |                                                                   | <p><u>Objectif principal :</u><br/>Décrire et comparer les tableaux clinico-biologiques des patients consultants aux urgences et infectés par les variants Delta et Omicron du SARS-CoV-2</p> <p><u>Objectifs secondaires :</u></p> <ul style="list-style-type: none"> <li>• Déterminer la proportion de patients vaccinés et le nombre de doses de vaccin qu'ils ont reçu</li> <li>• Comparer le devenir des patients avec une infection par SARS-CoV-2 après leur passage dans les SAU, durant la période de l'étude</li> <li>• Déterminer la proportion de patients ayant un « COVID accessoire » (COVID de découverte fortuite : exemple patient admis pour une cholécystite et dépisté SARS-CoV-2 positif)</li> </ul>                                                                                                                                                                                                                                                                                                                                                                                                                                                                                                                                                                                                                                                                                                                                                                                                               |
| Justification d'intérêt public de l'étude, la recherche ou l'évaluation |                                                                   | La vague actuelle de COVID-19 met de nouveau le système de soin sous tension afin de guider les décisions de politiques sanitaires à mettre en place ou à renforcer des mesures adaptées, il est essentiel de connaître les particularités des tableaux cliniques des patients infectés par le variant Omicron. En effet, les données issues d'autres pays avec d'autres systèmes de soins, d'autres politiques vaccinales et d'autres stratégies de dépistage sont parfois difficiles à utiliser dans le contexte de notre pays.                                                                                                                                                                                                                                                                                                                                                                                                                                                                                                                                                                                                                                                                                                                                                                                                                                                                                                                                                                                                        |
| Type d'étude                                                            |                                                                   | Étude observationnelle rétrospective, multicentrique                                                                                                                                                                                                                                                                                                                                                                                                                                                                                                                                                                                                                                                                                                                                                                                                                                                                                                                                                                                                                                                                                                                                                                                                                                                                                                                                                                                                                                                                                     |
| Population concernée (critères d'inclusion et de non inclusion)         |                                                                   | <u>Critères d'inclusion :</u>                                                                                                                                                                                                                                                                                                                                                                                                                                                                                                                                                                                                                                                                                                                                                                                                                                                                                                                                                                                                                                                                                                                                                                                                                                                                                                                                                                                                                                                                                                            |

|                                                                                                                         |                                                                                                                                                                                                                                                                                                                                                                                                                                                                                                                                                                                                                                                                                                                                 |
|-------------------------------------------------------------------------------------------------------------------------|---------------------------------------------------------------------------------------------------------------------------------------------------------------------------------------------------------------------------------------------------------------------------------------------------------------------------------------------------------------------------------------------------------------------------------------------------------------------------------------------------------------------------------------------------------------------------------------------------------------------------------------------------------------------------------------------------------------------------------|
|                                                                                                                         | <ol style="list-style-type: none"> <li>1. Patients ayant consulté, entre le 29 novembre 2021 et le 9 janvier 2022 inclus, dans les services d'accueil des urgences (SAU) participants</li> <li>2. ayant une PCR SARS-CoV-2 positive avec un résultat du criblage/séquençage de la PCR disponible</li> </ol>                                                                                                                                                                                                                                                                                                                                                                                                                     |
| Taille de la population d'étude                                                                                         | <u>Etude Rétrospective</u> : Estimation d'environ 1200 patients éligibles dans les 13 centres participants, compte tenu de la nécessité d'avoir la détermination du variant de l'infection par criblage/séquençage de la PCR., dans la période sur laquelle porte les données (29/11/2021 au 09/01/2022 inclus)                                                                                                                                                                                                                                                                                                                                                                                                                 |
| Information des participants                                                                                            | <u>Dérogation à l'information des participants</u> : Non applicable, car les données recueillies sont complètement dé-identifiées, et le fichier est ainsi anonyme.                                                                                                                                                                                                                                                                                                                                                                                                                                                                                                                                                             |
| Origine des données de santé à caractère personnel (source(s) utilisées)                                                | Données recueillies dans le cadre de la prise en charge habituelle des patients au cours du soin (dossiers médicaux des patients, dossier médical électronique des urgences et logiciel de biologie de l'hôpital)                                                                                                                                                                                                                                                                                                                                                                                                                                                                                                               |
| Mode de recueil des données à caractère personnel (papier, électronique...) et lieu d'hébergement de la base de données | Le recueil est électronique et local :<br>Chaque centre recueille les données dé-identifiées dans un fichier Excel, stocké dans un dossier sur un ordinateur local relié au réseau sécurisé de l'APHP.                                                                                                                                                                                                                                                                                                                                                                                                                                                                                                                          |
| Méthode et critères d'appariement le cas échéant                                                                        | Non applicable.                                                                                                                                                                                                                                                                                                                                                                                                                                                                                                                                                                                                                                                                                                                 |
| Circuit des données à caractère personnel et modalité de protection de leur confidentialité                             | Transfert des tableurs Excel via la plateforme de transfert de l'APHP (APHP Anywhere) hébergée sur les serveurs AP-HP, coordonné par le chef de projet de la FHU IMPEC. Il enverra par mail un lien à chaque centre ainsi qu'un mot de passe (mail séparé), afin de donner accès à la plateforme de transfert de l'APHP. Chaque centre aura son propre accès et chargera son fichier, n'aura accès qu'à son fichier et non aux autres fichiers Excel déposés sur la plateforme. Le chef de projet du FHU transmettra la base fusionnée au biostatisticien de L'URCEST chargé de l'analyse par la plateforme.                                                                                                                    |
| Principales variables et méthode d'analyse des données                                                                  | <p>L'analyse sera réalisée sur la base fusionnée, après le recueil finalisé de toutes les données.</p> <p>Les variables analysées seront les variables démographiques (age, sexe), les antécédents médicaux, le statut vaccinal, les paramètres vitaux aux urgences, les paramètres biologiques d'inflammation, le traitement mis en œuvre aux urgences et le suivi hospitalier.</p> <p>Les caractéristiques des patients seront comparées selon le variant (Delta / Omicron) soit par un test du chi-2 ou exact de Fisher selon les conditions de validité.</p> <p>Les variables quantitatives seront comparées par un test t de Student ou un test non paramétrique de Mann Whitney selon la distribution de la variable.</p> |
| Calendrier et organisation de l'étude, recherche ou évaluation                                                          | <p>Période d'inclusion : 6 semaines (du 29/11/2021 au 09/01/2022 inclus)</p> <p>Durée de suivi : durée de séjour à l'hôpital, censuré au 20 janvier 2022</p> <p>Collecte et centralisation des données : semaine du 14 au 19 janvier 2022</p> <p>Analyse statistique : dès réception sur la plateforme de la base fusionnée.</p>                                                                                                                                                                                                                                                                                                                                                                                                |

## **2. JUSTIFICATION SCIENTIFIQUE DE LA RECHERCHE**

### **2.1. Etat actuel des connaissances relatives au domaine concerné**

Les premiers cas d'infections par le SARS-CoV-2, nouveau virus de la famille des corona virus ont été décrits en décembre 2019 en Chine[1]. Le 11 mars 2020 l'OMS a déclaré le COVID 19 comme pandémie internationale[2]. À ce jour, on dénombre à travers le monde plus de cinq millions de décès[3]. Les politiques vaccinales sont souvent très inégales mais aussi difficiles à mettre en place, par manque de moyens dans les pays en voie de développement, ou à cause de mouvements anti-vaccins surtout dans les pays développés.

Depuis novembre 2021, un nouveau variant d'intérêt, Omicron a été détecté au Botswana et depuis s'est propagé très rapidement à travers le monde[4].

Les premières données publiées sur les caractéristiques cliniques de la COVID-19 liée au variant Omicron restent encore insuffisantes. Une équipe Sud-Africaine conduite sur 466 patients porteurs du variant Omicron a montré que ces derniers avaient des tableaux cliniques peu sévères, en effet, moins d'un tiers d'entre eux ont présenté des pneumonies et sur ceux qui étaient hospitalisés pour pneumonie à COVID-19, 45% d'entre eux ont été oxygéno-requérants[5]. En comparant le pourcentage d'admission en réanimation des malades pris en charge pour une infection liée à Omicron à ceux infectés précédemment par un autre variant, on constate une diminution de 4.3% à 1% ( $p < 0.001$ ). Le pendant de cette étude Sud-Africaine a été réalisé au Danemark et confirme ces observations et rapporte un nouvel élément qui est que 83% de leur population infectés par Omicron était vaccinée par deux doses au minimum ce qui pose l'hypothèse d'un variant avec beaucoup de mutations engendrant une réponse vaccinale[6].

Le but de ce travail descriptif est de préciser les caractéristiques des patients consultants aux urgences avec une infection à SARS-CoV-2 entre décembre 2021 et janvier 2022 en fonction du type de variant Delta ou Omicron et de comparer leur évolution hospitalière.

### **2.2. Description du ou des éléments sur lesquels porte la recherche**

Tout patient consultant dans un service d'accueil des urgences doit bénéficier d'une PCR SARS-CoV-2 en cas d'admission. Les cliniciens sont aussi amenés à prescrire des PCR SARS-  
Protocole « DOMURG », version 1.0 du 12/01/2022

CoV-2 chez des patients pouvant être pris en charge en ambulatoire en fonction de leur suspicion clinique.

Les patients ont dans ce cadre un prélèvement nasopharyngé profond selon les recommandations actuelles et la PCR SARS-CoV-2 est réalisée aux urgences ou directement au laboratoire de virologie. Devant l'émergence de nouveaux variants, et en particulier l'arrivée du variant Omicron, la plupart des PCR positives sont analysés par criblage ou séquençage afin d'en déterminer le variant. Les patients de SAU qui auront eu une PCR positive et une détermination du variant incriminé représente la population cible de cette étude rétrospective.

### **2.3. Faisabilité et cohérence du groupe de travail**

Ce travail est porté par la Fédération Hospitalo-Universitaire IMProving Emergency Care (FHU IMPEC). Ce réseau de recherche a une grande expérience dans la conduite d'études multicentriques, prospective mais également rétrospective incluant des milliers de malades (Etude PEPCOV, étude CONRAD et étude TRY SPEED,).

Le groupe de travail qui porte ce projet de recherche réunit des urgentistes de la FHU, ainsi que des infectiologues, virologues et méthodologiste, avec le soutien du Directeur Médical de Crise de l'APHP (Pr Bruno Riou) et du directeur de l'ANRS-ME (Pr Yazdan Yazdanpanah).

### **2.4. Résultats attendus et perspectives / Hypothèses/ Justification de l'intérêt public**

Cette pandémie constitue un véritable défi pour notre système de santé qui est forcé d'adopter une stratégie adaptative, au jour le jour, en fonction des nouvelles données acquises, du flux de patient et de l'offre de soins disponible. Les services d'accueil des urgences sont en première ligne pour accueillir les patients suspects et revoient leurs modes d'organisation pour apporter la réponse la plus adaptée au fur et à mesure de la crise sanitaire. Mieux comprendre les caractéristiques des patients infectés par le variant Omicron semble donc une nécessité pour guider les décisions de politiques sanitaires des semaines à venir.

## **3. OBJECTIFS**

### **3.1. Objectif principal**

Décrire et comparer les tableaux clinico-biologiques des patients consultants aux urgences et infectés par les variants Delta et Omicron du SARS-CoV-2.

### **3.2. Objectifs secondaires**

- Déterminer la proportion de patients vaccinés et le nombre de doses de vaccin qu'ils ont reçu.
- Comparer le devenir des patients avec une infection par SARS-CoV-2 après leur passage dans les SAU, durant la période de l'étude
- Déterminer la proportion de patients ayant une découverte de « COVID accessoire » (COVID de découverte fortuite : exemple patient admis pour une cholécystite et dépisté SARS-CoV-2 positif)

## **4. METHODE ET POPULATION**

### **4.1. Type d'étude**

Étude descriptive rétrospective multicentrique

### **4.2. Période de l'étude**

Rétrospective : consultation aux Urgences entre le 29/11/2021 et le 09/01/2022 inclus

### **4.3. Sources des données à caractère personnel**

Les données seront recueillies dans le cadre du soin à partir du dossier médical informatisé du patient dans une base de données électronique qui comprend les informations suivantes :

- 1- Données socio-démographiques et administratives : sexe, âge, semaine de consultation
- 2- Données cliniques à l'inclusion :
  - Antécédents : HTA, diabète surcharge pondérale, insuffisance rénale chronique, insuffisance respiratoire chronique, immunodépression
  - Statut vaccinal
  - Symptômes : fièvre, frissons, rhinorrhée, aguesie, céphalées, myalgies,

dyspnée, toux, douleur thoracique, douleur abdominale, diarrhée et la durée de ces symptômes

- PAS, fréquence cardiaque, fréquence respiratoire, saturation en O2 en air ambiant
- Type d'oxygénothérapie prescrite

3- Données biologiques à l'inclusion :

- Résultat de la PCR SARS-CoV-2
- Résultat du criblage ou séquençage
- Leucocytes, D-dimères, CRP

4- Données radiologiques à l'inclusion et/ou au décours de l'hospitalisation :

- Réalisation d'un scanner thoracique et l'étendu des lésions covid (en %) ainsi que la présence éventuelle d'une embolie pulmonaire

5- Données d'évolution intra-hospitalière :

- Mode de sortie du SAU : Retour à domicile (RAD), hospitalisation conventionnelle, ventilation mécanique, réanimation
- Si hospitalisation en réanimation, durée de séjour en réanimation
- Durée d'hospitalisation (censurée au 20/01/2022)
- Décès intra-hospitalier

Les données colligées seront dé-indentifiées.

#### **4.4. Population étudiée**

Tout patient consultant aux urgences durant la période de l'étude et ayant une PCR positive à SARS-CoV-2.

Critères d'inclusion :

3. Patients ayant consulté, entre le 29 novembre 2021 et le 9 janvier 2022 inclus, dans les services d'accueil des urgences (SAU) participants
4. ayant une PCR SARS-CoV-2 positive avec un résultat du criblage/séquençage de la PCR disponible

## **4.5. Critères de jugement**

En rapport avec les objectifs de l'étude, les critères de jugement sont les suivants :

### **4.5.1. Critère de jugement/d'évaluation principal**

Comparaison des proportions ou médianes des familles de variables suivantes entre les populations infectées par les variants Delta ou Omicron :

- Terrain : Age, sexe, HTA, diabète, surcharge pondérale, insuffisance rénale chronique, insuffisance respiratoire chronique, immunodépression, et statut vaccinal.
- Symptômes : fièvre, frissons, rhinorrhée, céphalées, myalgies dyspnée, toux, douleur thoracique, douleur abdominale, diarrhée et la durée de ces symptômes. Le type d'oxygénothérapie prescrite
- Biologiques : leucocytes, CRP, D-dimères
- Données tomodensitométriques : lésions typiques, EP

### **4.5.2. Critères de jugement/d'évaluation secondaires**

- Proportion de patients vaccinés et le nombre de doses de vaccin reçus
- Proportion de patient avec un diagnostic « accessoire » de COVID (COVID de découverte fortuite, ex : patient admis pour une autre cause et dépisté SARS-CoV-2 positif)
- Proportion de retour à domicile après passage aux urgences
- Proportion de patients admis en hospitalisation courante ou en réanimation, ou sous ventilation mécanique.
- Médiane des durées de séjours à l'hôpital, et en réanimation (censurées au 20/01/2022).
- Proportion de Décès intra-hospitalier censurées au 20/01/2022

## **4.6. Déroulement de la recherche**

Dans le cadre de la prise en charge habituelle des patients consultants aux urgences, les patients bénéficient d'un prélèvement nasopharyngé profond en vue de la réalisation d'une PCR SARS-CoV-2, en cas d'admission ou de suspicion clinique de SARS-CoV-2.

Une extraction des données de virologie durant la période de l'étude pourra fournir aux cliniciens des centres la liste des patients avec des PCR SARS-CoV-2 positives avec leur criblage. Les médecins participants à l'étude saisiront les données qui sont disponibles dans le dossier médical du patient dans un fichier anonymisé.

## **5. ASPECTS STATISTIQUES**

### **5.1. Justification statistique de la taille de l'échantillon**

L'effectif n'est pas justifié par une hypothèse statistique. Le recueil sera exhaustif sur la période de temps considérée.

### **5.2. Description des méthodes statistiques**

L'analyse sera réalisée une fois le recueil de données terminé par un biostatisticien de l'URCEST avec le logiciel SAS V9.4.

Les caractéristiques des patients seront décrites en fonction du type variant. Les variables qualitatives seront décrites par leur effectif, pourcentage et données manquantes par modalité de réponse. Alors que les variables quantitatives seront présentées par leur effectif, moyenne et écart-type ou médiane et intervalle interquartile, en fonction de la distribution de la variable.

Les caractéristiques des patients seront comparées selon le variant (Delta / Omicron) pour les variables qualitatives par un test du chi-2 ou exact de Fisher selon les conditions de validité. Les variables quantitatives seront comparées par un test t de Student ou un test non paramétrique de Mann Whitney selon la distribution de la variable.

La proportion de patients vaccinés et son intervalle de confiance à 95% sera calculé et le nombre de doses de vaccin reçu sera décrit (Aucune, une, deux, trois doses).

La proportion de patients ayant un « COVID accessoire » (COVID de découverte fortuite : exemple patient admis pour une cholécystite et dépisté SARS-CoV-2 positif) sera calculée.

Comparer le devenir des patients avec une infection par SARS-CoV-2 après leur passage dans les SAU, durant la période de l'étude. Les variables seront comparées comme décrit précédemment. Un modèle multivarié adapté à la variable à expliquer pourra être construit pour étudier les variables du devenir indépendamment des caractéristiques.

L'analyse des critères suivants : durées de séjours à l'hôpital, et en réanimation, proportion de patients admis en hospitalisation courante ou en réanimation, ou sous ventilation mécanique, proportion de décès intra-hospitalier, sera effectuée sur la sous population des patients admis à l'hôpital après passage aux urgences et n'ayant pas un Covid accessoire.

## **6. GESTION DES DONNEES**

### **6.1. Modalités de recueil des données**

Les données sources relatives à cette étude comprennent :

- Des données recueillies à partir des dossiers médicaux de patients pris en charge par le Service d'Accueil des Urgences (SAU).
- Les données cliniques relatives à la prise en charge des patients extraites de leurs dossiers médicaux et logiciels du soin.

Le recueil sera électronique, la saisie des données sera réalisée sur un fichier Excel pour chacun des centres participants. Le fichier sera stocké dans un dossier dédié sur le serveur du centre.

Les patients seront identifiés dans chaque centre par un identifiant composé de la lettre P et un rang de saisie dans le centre (format texte 5 caractères : P0001).

Conformément aux bonnes pratiques, ces données seront récupérées et conservées par les personnes de la recherche en charge de cette mission et elles prendront toutes les précautions nécessaires en vue d'assurer la confidentialité des informations.

### **6.2. Circuit des données et méthode de protection de leur confidentialité**

#### **6.2.1. Circuit**

Une fois la saisie terminée, chaque centre transmettra au chef de projet du FHU le fichier Excel de son centre via la plateforme de transfert de l'APHP (APHP Anywhere) hébergée sur les serveurs AP-HP. Pour cela, il enverra à chaque centre par mail un lien ainsi qu'un mot de passe (mail séparé), vers la plateforme. Chaque centre aura son propre accès lui permettant de charger son fichier. Chaque centre n'aura accès qu'à son propre fichier mais non aux autres fichiers Excel.

Le chef de projet du FHU transmettra la base fusionnée au format Excel au biostatisticien de l'URCEST (APHP.SU) en charge de l'analyse via la plateforme selon le même procédé.

#### **6.2.2. Confidentialité**

Les personnes responsables du contrôle de la qualité des études (article L.1121-3 du code de la santé publique) prendront toutes les précautions nécessaires pour assurer la

confidentialité des informations relatives à l'étude, aux participants à l'étude et à notamment à leur dé-identification et les résultats obtenus.

Ces personnes sont tenues au secret professionnel (conformément aux conditions énoncées aux articles 226-13 et 226-14 du code pénal français). Pendant et après l'étude, toutes les données collectées sur les participants à l'étude et envoyées par les investigateurs (ou tout autre collaborateur spécialisé) seront anonymisées.

Les noms et adresses des sujets ne seront en aucun cas affichés.

### **6.3. Conservation des documents et des données**

Les données concernant les patients seront rendues anonyme pour toute leur exploitation dans le cadre de cette recherche.

Les documents et données de la recherche seront conservés pendant 15 ans après la fin de la recherche.

## **7. ASPECTS ETHIQUES ET LEGAUX**

### **7.1. Rôle du promoteur**

L'Assistance Publique - Hôpitaux de Paris est le gestionnaire de cette recherche et la DRCI en est son représentant.

### **7.2. Modalités d'information de la population concernée**

**Dérogation à l'information des participants : Non applicable**, car les données recueillies sont complètement dé-identifiées, et le fichier est ainsi anonyme

### **7.3. Démarches relatives à la réglementation informatique et liberté**

#### **7.3.1. Traitement des données en France**

Aucune démarche particulière n'est à effectuer dans le cadre de cette recherche, toutes les données étant dé-identifiées

Le traitement de données mis en œuvre dans le cadre de cette recherche fera donc l'objet d'une inscription au registre de l'AP-HP, placé sous la responsabilité du Référent pour la Protection des Données de l'AP-HP.

#### **7.4. Demande d'avis au Comité d'Ethique**

Un avis éthique a été sollicité auprès du Comité d'Ethique Sorbonne-Université.

#### **Responsabilités de l'investigateur vis-à-vis du gestionnaire**

L'investigateur coordonnateur ou la personne qualifiée s'engage à fournir au gestionnaire les informations relatives à l'état d'avancement de la recherche.

L'Assistance Publique - Hôpitaux de Paris se réserve le droit d'interrompre la recherche à tout moment pour des raisons administratives.

#### **7.5. Rapport final de la recherche**

Le rapport sera établi dans le mois qui suit le dernier recueil de données et envoyé à la DRCI de l'APHP, gestionnaire de l'étude. .

### **8. REGLES RELATIVES A LA PUBLICATION**

L'AP-HP, en tant que gestionnaire, est propriétaire des données et aucune utilisation ou transmission à un tiers ne peut être effectuée sans son accord préalable.

Seront signataires des publications, les personnes ayant réellement participé à l'élaboration du protocole et son déroulement ainsi qu'à la rédaction des résultats. La liste et l'ordre des signataires de la publication principale sera :

D Bouzid, S Marot, Inv1, ... Inv 13, B Riou, T Simon, D Visseaux, Y Freund

InvN représente l'investigateur local de chaque centre participant.

L'Assistance Publique- Hôpitaux de Paris doit être mentionnée comme étant le gestionnaire de la recherche et les termes « Assistance Publique- Hôpitaux de Paris » doivent apparaître dans l'adresse des auteurs.

## **9. BIBLIOGRAPHIE**

- [1] Li Q, Guan X, Wu P, Wang X, Zhou L, Tong Y, et al. Early Transmission Dynamics in Wuhan, China, of Novel Coronavirus-Infected Pneumonia. New England Journal of Medicine 2020;0:null. <https://doi.org/10.1056/NEJMoa2001316>.
- [2] World Health Organization (WHO). Report of the WHO-China Joint Mission on Coronavirus Disease 2019 (COVID-19) 2020 [cited 2020 1 March]. n.d.
- [3] Update on Omicron n.d. <https://www.who.int/news/item/28-11-2021-update-on-omicron> (accessed January 7, 2022).
- [4] Karim SSA, Karim QA. Omicron SARS-CoV-2 variant: a new chapter in the COVID-19 pandemic. Lancet 2021;398:2126–8. [https://doi.org/10.1016/S0140-6736\(21\)02758-6](https://doi.org/10.1016/S0140-6736(21)02758-6).
- [5] Abdullah F, Myers J, Basu D, Tintinger G, Ueckermann V, Mathebula M, et al. Decreased severity of disease during the first global omicron variant covid-19 outbreak in a large hospital in tshwane, south africa. Int J Infect Dis 2021:S1201-9712(21)01256-X. <https://doi.org/10.1016/j.ijid.2021.12.357>.
- [6] Brandal LT, MacDonald E, Veneti L, Ravlo T, Lange H, Naseer U, et al. Outbreak caused by the SARS-CoV-2 Omicron variant in Norway, November to December 2021. Eurosurveillance 2021;26:2101147. <https://doi.org/10.2807/1560-7917.ES.2021.26.50.2101147>.

## **10. ADDENDA**

### **10.1. Liste des variables**

- 1- Données socio-démographiques et administratives : sexe, âge, semaine de consultation
- 2- Données cliniques à l'inclusion :
  - Antécédents : HTA, diabète surcharge pondérale, insuffisance rénale chronique, insuffisance respiratoire chronique, immunodépression
  - Statut vaccinal
  - Symptômes : fièvre, frissons, rhinorrhée, aguesie, céphalées, myalgies, dyspnée, toux, douleur thoracique, douleur abdominale, diarrhée et la durée de ces symptômes
  - PAS, fréquence cardiaque, fréquence respiratoire, saturation en O2 en air ambiant

- Type d'oxygénothérapie prescrite
- 3- Données Biologiques à l'inclusion :
  - Résultat de la PCR SARS-CoV-2
  - Résultat du criblage ou séquençage
  - Leucocytes, D-dimères, CRP
- 4- Données radiologiques à l'inclusion et au décours de l'hospitalisation :
  - La réalisation d'un scanner thoracique et la présence ou non d'une atteinte typique de COVID-19 ou d'une EP
- 5- Données d'évolution intra-hospitalière :
  - Mode de sortie du SAU : RAD, hospitalisation conventionnelle, VM, réanimation
  - Si Hospitalisation Conventionnelle, admission secondaire en réanimation
  - Si hospitalisation en réanimation, durée de séjour en réanimation
  - Durée d'hospitalisation (censurée au 20/01/2022)
  - Décès intra-hospitalier

## 10.2. Supports utilisés pour le recueil des données à caractère personnel

Fichier Excel désidentifié (1 fichier par centre participant)

## 10.3. Liste des équipes associées à la recherche

| N° CENTRE | INSTITUTION                      | SERVICE              | NOM                     |
|-----------|----------------------------------|----------------------|-------------------------|
| 001       | APHP - Hôpital Bichat            | Service des Urgences | Dr Donia BOUZID         |
| 002       | APHP - Hôpital Pitié Salpêtrière | Service des Urgences | Pr Yonathan FREUND      |
| 003       | APHP - Hôpital Saint-Antoine     | Service des Urgences | Dr Christelle HERMAND   |
| 004       | APHP - Hôpital Tenon             | Service des Urgences | Dr Arthur BOURG         |
| 005       | APHP - Hôpital Cochin            | Service des Urgences | Dr Jennifer TRUCHOT     |
| 006       | APHP - Hôpital Louis Mourier     | Service des Urgences | Pr Nicolas JAVAUD       |
| 007       | APHP - Hôpital Avicenne          | Service des Urgences | Pr Frederic ADNET       |
| 008       | APHP - Hôpital Henri Mondor      | Service des Urgences | Dr Christian KASSASSEYA |

|     |                              |                      |                                |
|-----|------------------------------|----------------------|--------------------------------|
| 009 | APHP - Hôpital Ambroise Paré | Service des Urgences | Dr Sébastien BEAUNE            |
| 010 | APHP - Hôpital Lariboisière  | Service des Urgences | Dr Anthony CHAUVIN             |
| 011 | APHP - HEGP                  | Service des Urgences | Dr Richard CHOCRON             |
| 012 | APHP - Hôpital Saint-Louis   | Service des Urgences | Dr Olivier PEYRONY             |
| 013 | APHP - Hôpital Beaujon       | Service des Urgences | Dr Pabrakar VAITTINADA<br>AYAR |
